# Supplementary material
Source: HighWire-hosted journal article supplement (https://bmjopen.bmj.com/content/13/7/e067101)
Supplement: inline-supplementary-material-4 [file inline-supplementary-material-4.pdf]

**Supplementary Table 1:** Effect of 1:1 propensity matching on baseline characteristics

|                                                  | Before Matching       |                           |        | After matching        |                          |        |
|--------------------------------------------------|-----------------------|---------------------------|--------|-----------------------|--------------------------|--------|
|                                                  | COVID-19<br>(n = 373) | Influenza A<br>(n = 1371) | SMD    | COVID-19<br>(n = 373) | Influenza A<br>(n = 373) | SMD    |
| <b>Age (years)</b>                               | 64.574                | 61.953                    | 0.194  | 64.574                | 63.697                   | 0.099  |
| <b>Male Gender (%)</b>                           | 64.9                  | 57.1                      | 0.163  | 64.9                  | 60                       | 0.094  |
| <b>PaO2/FiO2 ratio (mmHg)</b>                    | 26.1037               | 27.466                    | -0.093 | 26.1037               | 27.598                   | -0.098 |
| <b>APACHE IV</b>                                 | 57.756                | 80.676                    | -0.988 | 57.756                | 59.198                   | -0.062 |
| <b>Charlson Comorbidity Index</b>                | 0.298                 | 0.909                     | -0.764 | 0.298                 | 0.338                    | -0.05  |
| <b>Acute Myocardial Infarction (%)</b>           | 1.6                   | 5.9                       | -0.342 | 1.6                   | 2.1                      | -0.043 |
| <b>Congestive Heart Failure (%)</b>              | 2.1                   | 9.3                       | -0.496 | 2.1                   | 2.9                      | -0.056 |
| <b>Peripheral Vascular Disease (%)</b>           | 0.5                   | 2                         | -0.206 | 0.5                   | 0.8                      | -0.037 |
| <b>Cerebral Vascular Disease (%)</b>             | 5.6                   | 9.1                       | -0.151 | 5.6                   | 7                        | -0.058 |
| <b>Dementia (%)</b>                              | 0                     | 0.4                       | -0.068 | 0                     | 0                        | 0      |
| <b>Chronic Obstructive Pulmonary Disease (%)</b> | 3.2                   | 11.3                      | -0.458 | 3.2                   | 5.4                      | -0.122 |
| <b>Connective tissue disease (%)</b>             | 0.8                   | 1.6                       | -0.09  | 0.8                   | 0.8                      | 0      |
| <b>Peptic Ulcer Disease (%)</b>                  | 2.1                   | 4.1                       | -0.134 | 2.1                   | 3.2                      | -0.074 |
| <b>Diabetes (%)</b>                              | 13.7                  | 24.9                      | -0.274 | 13.7                  | 15.3                     | -0.039 |
| <b>Malignancy (%)</b>                            | 5.4                   | 10                        | -0.205 | 5.4                   | 4.6                      | 0.036  |
| <b>Liver Disease (%)</b>                         | 1.6                   | 8.4                       | -0.538 | 1.6                   | 2.1                      | -0.043 |
| <b>Renal Disease (%)</b>                         | 2.9                   | 9                         | -0.356 | 2.9                   | 4                        | -0.063 |
| <b>HIV/AIDS (%)</b>                              | 0.3                   | 0.6                       | -0.061 | 0.3                   | 0.3                      | 0      |
| <b>Hemiplegia (%)</b>                            | 0.5                   | 1.5                       | -0.136 | 0.5                   | 0.3                      | 0.037  |
| <b>Bacterial Coinfection (%)</b>                 | 18.8                  | 67.2                      | -1.24  | 18.8                  | 21.7                     | -0.076 |

**Legend:** All values are expressed as mean or percentages. APACHE IV, Acute Physiology and Chronic Health Evaluation IV; COPD, Chronic Obstructive Pulmonary Disease; HIV, human immunodeficiency virus; COVID-19, coronavirus disease 2019; SMD, standard mean difference.
