# Supplementary material
Source: HighWire-hosted journal article supplement (https://bmjopen.bmj.com/content/13/7/e067101)
Supplement: inline-supplementary-material-5 [file inline-supplementary-material-5.pdf]

**Supplementary Table 2:** Effect of 1:2 propensity matching on baseline characteristics

|                                                     | Before Matching       |                           |        | After 1:2 matching    |                          |        |
|-----------------------------------------------------|-----------------------|---------------------------|--------|-----------------------|--------------------------|--------|
|                                                     | COVID-19<br>(n = 373) | Influenza A<br>(n = 1371) | SMD    | COVID-19<br>(n = 373) | Influenza A<br>(n = 746) | SMD    |
| <b>Age (years)</b>                                  | 64.574                | 61.953                    | 0.194  | 64.574                | 63.071                   | 0.111  |
| <b>Male Gender (%)</b>                              | 64.9                  | 57.1                      | 0.163  | 0.649                 | 0.598                    | 0.107  |
| <b>PaO<sub>2</sub>/FiO<sub>2</sub> ratio (mmHg)</b> | 26.1037               | 27.466                    | -0.093 | 26.104                | 26.828                   | -0.049 |
| <b>APACHE IV</b>                                    | 57.756                | 80.676                    | -0.988 | 57.756                | 65.125                   | -0.318 |
| <b>Charlson Comorbidity Index</b>                   | 0.298                 | 0.909                     | -0.764 | 0.298                 | 0.445                    | -0.184 |
| <b>Acute Myocardial Infarction (%)</b>              | 1.6                   | 5.9                       | -0.342 | 0.016                 | 0.028                    | -0.096 |
| <b>Congestive Heart Failure (%)</b>                 | 2.1                   | 9.3                       | -0.496 | 0.021                 | 0.042                    | -0.139 |
| <b>Peripheral Vascular Disease (%)</b>              | 0.5                   | 2                         | -0.206 | 0.005                 | 0.007                    | -0.018 |
| <b>Cerebral Vascular Disease (%)</b>                | 5.6                   | 9.1                       | -0.151 | 0.056                 | 0.072                    | -0.070 |
| <b>Dementia (%)</b>                                 | 0                     | 0.4                       | -0.068 | 0.000                 | 0.000                    | 0.000  |
| <b>Chronic Obstructive Pulmonary Disease (%)</b>    | 3.2                   | 11.3                      | -0.458 | 0.032                 | 0.055                    | -0.129 |
| <b>Connective tissue disease (%)</b>                | 0.8                   | 1.6                       | -0.09  | 0.008                 | 0.011                    | -0.030 |
| <b>Peptic Ulcer Disease (%)</b>                     | 2.1                   | 4.1                       | -0.134 | 0.021                 | 0.032                    | -0.074 |
| <b>Diabetes (%)</b>                                 | 13.7                  | 24.9                      | -0.274 | 0.137                 | 0.180                    | -0.105 |
| <b>Malignancy (%)</b>                               | 5.4                   | 10                        | -0.205 | 0.054                 | 0.063                    | -0.042 |
| <b>Liver Disease (%)</b>                            | 1.6                   | 8.4                       | -0.538 | 0.016                 | 0.024                    | -0.064 |
| <b>Renal Disease (%)</b>                            | 2.9                   | 9                         | -0.356 | 0.029                 | 0.044                    | -0.087 |
| <b>HIV/AIDS (%)</b>                                 | 0.3                   | 0.6                       | -0.061 | 0.003                 | 0.005                    | -0.052 |
| <b>Hemiplegia (%)</b>                               | 0.5                   | 1.5                       | -0.136 | 0.005                 | 0.008                    | -0.037 |
| <b>Bacterial Coinfection (%)</b>                    | 18.8                  | 67.2                      | -1.24  | 0.188                 | 0.469                    | -0.721 |

**Legend:** All values are expressed as mean or percentages. APACHE IV, Acute Physiology and Chronic Health Evaluation IV; COPD, Chronic Obstructive Pulmonary Disease; HIV, human immunodeficiency virus; COVID-19, coronavirus disease 2019; SMD, standard mean difference.
