# Supplementary material
Source: HighWire-hosted journal article supplement (https://bmjopen.bmj.com/content/13/7/e067101)
Supplement: inline-supplementary-material-6 [file inline-supplementary-material-6.pdf]

**Supplementary Table 3:** APACHE IV Standardized Mortality Rates of ICU patients with Influenza 2015 to 2020

| Year    | Number of Deaths | Number of Patients | APACHE IV Predicted Mortality | Standardized Mortality Rate |
|---------|------------------|--------------------|-------------------------------|-----------------------------|
| 2015    | 133              | 229                | 0.41                          | 1.42 (95%CI 1.19 – 1.67)    |
| 2016    | 106              | 287                | 0.32                          | 1.15 (95%CI 0.95 – 1.39)    |
| 2017    | 102              | 268                | 0.35                          | 1.09 (95%CI 0.89 – 1.31)    |
| 2018    | 43               | 147                | 0.29                          | 1.01 (95%CI 0.73 – 1.34)    |
| 2019    | 115              | 384                | 0.30                          | 1.00 (95%CI 0.83 – 1.20)    |
| 2020    | 13               | 56                 | 0.32                          | 0.72 (95%CI 0.40 – 1.20)    |
| Overall | 512              | 1371               | 0.33                          | 1.13 (95%CI 1.04 – 1.23)    |

**Legend:** APACHE, Acute Physiology and Chronic Health Evaluation IV.
