# Supplementary material
Source: HighWire-hosted journal article supplement (https://bmjopen.bmj.com/content/13/7/e067101)
Supplement: inline-supplementary-material-7 [file inline-supplementary-material-7.pdf]

**Supplementary Table 4:** Subgroup analysis on age and clinical outcomes

|                                             | <b>COVID-19</b>    | <b>Influenza A</b> | <b>P value</b> |
|---------------------------------------------|--------------------|--------------------|----------------|
| <b>Age &gt; 65</b>                          |                    |                    |                |
| <b>Median Time to Death, days (IQR)</b>     | 27.0 (12.8 - 39.0) | 8.0 (5.2 - 16.5)   | 0.003          |
| <b>Median Time to Discharge, days (IQR)</b> | 28.0 (21.0 - 47.0) | 12.0 (8.0 - 18.0)  | ≤ 0.001        |
| <b>Age ≤ 65</b>                             |                    |                    |                |
| <b>Median Time to Death, days (IQR)</b>     | 12.0 (6.8 - 19.2)  | 15.0 (5.8 - 21.2)  | 0.949          |
| <b>Median Time to Discharge, days (IQR)</b> | 22.0 (17.0 - 30.2) | 9.0 (6.0 - 16.0)   | < 0.001        |

**Legend:** COVID-19, coronavirus disease 2019; IQR, interquartile range
