# Supplementary material
Source: HighWire-hosted journal article supplement (https://bmjopen.bmj.com/content/13/7/e067101)
Supplement: inline-supplementary-material-9 [file inline-supplementary-material-9.pdf]

**Supplementary Table 6:** Univariate and multivariate analysis of factors associated with hospital mortality in influenza A patients

|                                                              | Univariable analysis   |         | Multivariable analysis |         |
|--------------------------------------------------------------|------------------------|---------|------------------------|---------|
|                                                              | Relative risk (95% CI) | P value | Relative risk (95% CI) | P value |
| <b>Age, years</b>                                            | 1.03 (1.03 – 1.04)     | < 0.001 | 1.02 (1.02 – 1.03)     | < 0.001 |
| <b>P<sub>a</sub>O<sub>2</sub>/F<sub>i</sub>O<sub>2</sub></b> | 1.00 (0.99 – 1.00)     | 0.014   | 1.00 (0.99 – 1.00)     | 0.048   |
| <b>Charlson Comorbidity Index</b>                            | 1.14 (1.10 – 1.18)     | < 0.001 | 1.11 (1.07 – 1.14)     | < 0.001 |
| <b>APACHE IV</b>                                             | 1.01 (1.01 – 1.02)     | < 0.001 | 1.01 (1.01 – 1.01)     | < 0.001 |
| <b>Early Bacterial-viral Coinfection</b>                     | 1.85 (1.54 – 2.22)     | < 0.001 | 1.44 (1.22 – 1.68)     | < 0.001 |

**Legend:** APACHE IV, Acute Physiology and Chronic Health Evaluation IV
